# Supplementary material
Source: PubMed Central journal article supplement (PMC5069121)
Supplement: NIHMS795519-supplement-01.pdf [file NIHMS795519-supplement-01.pdf]

Supplemental Table. Estimated parameters from univariate biometric models for LUTS symptoms and total score

| Symptom             | Model     | -2lnL           | df          | AIC             | $\Delta$ -2LL | $\Delta$ df | p           |
|---------------------|-----------|-----------------|-------------|-----------------|---------------|-------------|-------------|
| Incomplete Emptying | ACE       | 6243.96         | 3156        | -68.04          | –             | –           | –           |
|                     | <b>AE</b> | <b>6243.96</b>  | <b>3157</b> | <b>-70.04</b>   | <b>0</b>      | <b>1</b>    | <b>1.00</b> |
|                     | CE        | 6252.17         | 3157        | -61.83          | 8.21          | 1           | 0.00        |
|                     | E         | 6308.23         | 3158        | -7.77           | 64.27         | 2           | 0.00        |
| Frequency           | ACE       | 9323.42         | 3152        | 3019.42         | –             | –           | –           |
|                     | <b>AE</b> | <b>9323.42</b>  | <b>3153</b> | <b>3017.42</b>  | <b>0</b>      | <b>1</b>    | <b>1.00</b> |
|                     | CE        | 9344.88         | 3153        | 3038.88         | 21.46         | 1           | 0.00        |
|                     | E         | 9428.51         | 3154        | 3120.51         | 105.09        | 2           | 0.00        |
| Intermittency       | ACE       | 6709.09         | 3154        | 401.09          | –             | –           | –           |
|                     | <b>AE</b> | <b>6709.11</b>  | <b>3155</b> | <b>399.11</b>   | <b>0.02</b>   | <b>1</b>    | <b>0.90</b> |
|                     | CE        | 6716.60         | 3155        | 406.60          | 7.51          | 1           | 0.01        |
|                     | E         | 6802.73         | 3156        | 490.73          | 93.63         | 2           | 0.00        |
| Urgency             | ACE       | 6364.38         | 3154        | 56.38           | –             | –           | –           |
|                     | <b>AE</b> | <b>6364.38</b>  | <b>3155</b> | <b>54.38</b>    | <b>0</b>      | <b>1</b>    | <b>1.00</b> |
|                     | CE        | 6371.44         | 3155        | 61.44           | 7.07          | 1           | 0.01        |
|                     | E         | 6441.66         | 3156        | 129.66          | 77.29         | 2           | 0.00        |
| Weak Stream         | ACE       | 6440.64         | 3152        | 136.64          | –             | –           | –           |
|                     | <b>AE</b> | <b>6440.64</b>  | <b>3153</b> | <b>134.64</b>   | <b>0</b>      | <b>1</b>    | <b>1.00</b> |
|                     | CE        | 6451.95         | 3153        | 145.95          | 11.31         | 1           | 0.00        |
|                     | E         | 6509.75         | 3154        | 201.75          | 69.1          | 2           | 0.00        |
| Straining           | ACE       | 4325.17         | 3153        | -1980.83        | –             | –           | –           |
|                     | <b>AE</b> | <b>4325.44</b>  | <b>3154</b> | <b>-1982.56</b> | <b>0.26</b>   | <b>1</b>    | <b>0.61</b> |
|                     | CE        | 4328.31         | 3154        | -1979.69        | 3.14          | 1           | 0.08        |
|                     | E         | 4385.45         | 3155        | -1924.55        | 60.28         | 2           | 0.00        |
| Nocturia            | ACE       | 9134.34         | 3149        | 2836.34         | –             | –           | –           |
|                     | <b>AE</b> | <b>9134.34</b>  | <b>3150</b> | <b>2834.34</b>  | <b>0</b>      | <b>1</b>    | <b>1.00</b> |
|                     | CE        | 9139.11         | 3150        | 2839.11         | 4.77          | 1           | 0.03        |
|                     | E         | 9172.85         | 3151        | 2870.85         | 38.51         | 2           | 0.00        |
| I-PSS-Total         | ACE       | 19503.52        | 3160        | 13183.52        | –             | –           | –           |
|                     | <b>AE</b> | <b>19503.52</b> | <b>3161</b> | <b>13181.52</b> | <b>0</b>      | <b>1</b>    | <b>1.00</b> |
|                     | CE        | 19524.32        | 3161        | 13202.32        | 20.81         | 1           | 0.00        |
|                     | E         | 19667.83        | 3162        | 13343.83        | 164.31        | 2           | 0.00        |

Note: -2lnL = log-likelihood; df = degrees of freedom; AIC = Akaike information criterion; A = additive genetic, C = shared environment, E = non-shared environment; I-PSS = International

Prostate Symptom Score;  $\Delta\chi^2$  and  $\Delta df$  are relative to the base model; best fitting models in bold.
